# Supplementary material for: RNA Interference Reveals the Impacts of CYP6CY7 on Imidacloprid Resistance in Aphis glycines
Source: MDPI journal article supplement (doi:10.3390/insects15030188), 2024-03-13
Supplement: s1 [file s1]

**Table S1 Primers for cloning, qRT-PCR and RNA interference**

| Primer name             | Primer sequences (5'-3')    | usage              |
|-------------------------|-----------------------------|--------------------|
| <i>CYP6CY7-F</i>        | CAGTCACGCACGGATGTTCT        | RT-PCR for cloning |
| <i>CYP6CY7-R</i>        | GCCGTTTTTCGGACTGACG         |                    |
| <i>CYP6CY8-F</i>        | AGCTTTGCTAATAATTTGGTTTGA    |                    |
| <i>CYP6CY8-R</i>        | TCAGTTACATGACACTTGTATTGTT   |                    |
| <i>CYP6CY9-F</i>        | TGTTTCGAGATAGCGACCAGC       |                    |
| <i>CYP6CY9-R</i>        | GCAATAGGGCATATATTAAACGGGG   |                    |
| <i>CYP6CY12-F</i>       | ATACGTTGCAGTTTTCACGC        |                    |
| <i>CYP6CY12-R</i>       | GCCATTTTGGCCACCATCAT        |                    |
| <i>CYP6CY14-F</i>       | TAAGCGTTCCTGCGACAAT         |                    |
| <i>CYP6CY14-R</i>       | AAAGTGAGTACAGCGCCACA        |                    |
| <i>CYP6CY16-F</i>       | TGACGTACGATAAATGGCGGA       |                    |
| <i>CYP6CY16-R</i>       | TGTTCAAGACAGCTCGTCAA        |                    |
| <i>CYP6CY18-F</i>       | TGTATTTTTCATACAATGTTTGGCTCG |                    |
| <i>CYP6CY18-R</i>       | TAGCCAAATACCATTTTCTGGCA     |                    |
| <i>CYP6CY20-F</i>       | TGCAAGCAATCTTGGACGATG       |                    |
| <i>CYP6CY20-R</i>       | AATGTTAGCCAAATTCATGTTTGT    |                    |
| <i>CYP6CY48-F</i>       | ATTCATAAGAGAGATACACGTGGTG   |                    |
| <i>CYP6CY48-R</i>       | TTACAGGAATTACGGTTTTTTCAC    |                    |
| <i>CYP6CZ1-F</i>        | TATTGGTCACCGCGTTCCT         |                    |
| <i>CYP6CZ1-R</i>        | AATGGGTGAAATACCAATTCTCAG    |                    |
| <i>CYP6DB1-F</i>        | TCTGCCGCACCGCTATTATT        |                    |
| <i>CYP6DB1-R</i>        | TGGACCAAGTCCGAAGGGTA        |                    |
| <i>CYP6DD1-F</i>        | TTTCCAGCGCCGTCATAAT         |                    |
| <i>CYP6DD1-R</i>        | GTGCGGTCTCAATGTGTTCTG       |                    |
| <i>TBP-q-F</i>          | ATAGTATGATGCATTACAAACGCC    | qRT-PCR            |
| <i>TBP-q-R</i>          | TTGTAGCGCTGGTATAGTTGATGAT   |                    |
| <i>RPS9-q-F</i>         | TAAGCGTGAAAGTATGGCGTGTGA    |                    |
| <i>RPS9-q-R</i>         | ATACACCAATGCGAACCAATCTACG   |                    |
| <i>CYP6CY7-q-F</i>      | GGTGTAGATACTCATCCGTCTGTCA   |                    |
| <i>CYP6CY7-q-R</i>      | GCTTCTGTGCGATCGTTCTCC       |                    |
| <i>CYP6CY8-q-F</i>      | GGCATAGAGCACCCAATAGACTTGT   |                    |
| <i>CYP6CY8-q-R</i>      | CGCATCTGAAACATACCTCCGTACT   |                    |
| <i>CYP6CY9-q-F</i>      | AATAGCATACGCAGGAATCAGAAC    |                    |
| <i>CYP6CY9-q-R</i>      | AAGCAACGAAGGATTACCAAGTG     |                    |
| <i>CYP6CY12-q-F</i>     | TGTCACCTTATGTCGCCAAGATTG    |                    |
| <i>CYP6CY12-q-R</i>     | CTATGCCGTTTCGCCTCTCTG       |                    |
| <i>CYP6CY14-q-F</i>     | GTATTATCCAAATCCCAGCACTTTC   |                    |
| <i>CYP6CY14-q-R</i>     | ACGAGGTCCATCTCCAAACG        |                    |
| <i>CYP6CY16-q-F</i>     | AAGGCACCTTACTTGGCATTG       |                    |
| <i>CYP6CY16-q-R</i>     | TGTTGACGGGAATTCGGTTTG       |                    |
| <i>CYP6CY18-q-F</i>     | TTGAGCCCAGCGTTCACTTCAG      |                    |
| <i>CYP6CY18-q-R</i>     | TTTGCCCAACATATCTCGCACTTCT   |                    |
| <i>CYP6CY20-q-F</i>     | GCTCTGTTGCTGTGGATCGCT       |                    |
| <i>CYP6CY20-q-R</i>     | GATACGCACACGACTCGGCA        |                    |
| <i>CYP6CY48-q-F</i>     | AGTAAGCCGTTTCCGTTATTCTG     |                    |
| <i>CYP6CY48-q-R</i>     | TGACCAGAGAACTCGTTGTAGAT     |                    |
| <i>CYP6CZ1-q-F</i>      | CCAGTACACGCCATTCACTACGA     |                    |
| <i>CYP6CZ1-q-R</i>      | GGACCATCTCCGAACGGCATAT      |                    |
| <i>CYP6DB1-q-F</i>      | GTAATGCTAAGGACCGTGTCT       |                    |
| <i>CYP6DB1-q-R</i>      | ATGATGCTCGGCGACCAA          |                    |
| <i>CYP6DD1-q-F</i>      | CGCACCGTATAGACCATCCG        |                    |
| <i>CYP6DD1-q-R</i>      | GGTTCCAATCACAGCACTCG        | RNA interference   |
| <i>siRNA of CYP6CY7</i> | GCACGGCAUAUUUCAUAUTT        |                    |
|                         | AUAUGAAAUAUUGCCGUGCTT       |                    |
|                         | UUCUCCGAACGUGACGUTT         |                    |
| Negative control        | ACGUGACACGUUCGGAGAATT       |                    |
